# Supplementary material for: Expression And Clinical Significance of Transcription Factor GRHL1 In Acute Myeloid Leukemia
Source: Research Square preprint supplement (doi:10.21203/rs.3.rs-1242340/v1), 2022-01-24
Supplement: Supplementary file 1 [file 33dd192c6ecf129a5ed6a7d0.docx]

**Table S2.** Genes negatively associated with GRHL1 in patients with AML.

| Correlated Gene | Cytoband | Spearman R values | *p*-Value |
| --- | --- | --- | --- |
| TRIM46 | 1q22 | -0.486369387 | 4.64E-11 |
| ARSD | Xp22.33 | -0.451114767 | 1.51E-09 |
| TMCO3 | 13q34 | -0.430777268 | 9.47E-09 |
| MAPKAPK3 | 3p21.2 | -0.421739149 | 2.06E-08 |
| MAMDC2 | 9q21.12 | -0.416649925 | 3.16E-08 |
| AADACP1 | 3q25.1 | -0.413971927 | 3.95E-08 |
| ITPRIPL2 | 16p12.3 | -0.413454785 | 4.12E-08 |
| GMPR2 | 14q12 | -0.411405516 | 4.88E-08 |
| TERF2 | 16q22.1 | -0.409979757 | 5.49E-08 |
| SPN | 16p11.2 | -0.407613192 | 6.65E-08 |
| CCDC103 | 17q21.31 | -0.40435349 | 8.65E-08 |
| CCNA1 | 13q13.3 | -0.396306884 | 1.63E-07 |
| C3AR1 | 12p13.31 | -0.39382393 | 1.98E-07 |
| ORAI3 | 16p11.2 | -0.393133913 | 2.09E-07 |
| TBXAS1 | 7q34 | -0.389420566 | 2.78E-07 |
| IGF2BP2 | 3q27.2 | -0.382517622 | 4.68E-07 |
| C1RL | 12p13.31 | -0.381880256 | 4.91E-07 |
| MNT | 17p13.3 | -0.375473348 | 7.86E-07 |
| ZNF804A | 2q32.1 | -0.37412899 | 8.67E-07 |
| SLC45A3 | 1q32.1 | -0.370655697 | 1.11E-06 |
| VAT1 | 17q21.31 | -0.368955594 | 1.26E-06 |
| LINC00908 | 18q23 | -0.366075649 | 1.54E-06 |
| KATNIP | 16p12.1 | -0.363937034 | 1.79E-06 |
| TMEM43 | 3p25.1 | -0.362374104 | 2.00E-06 |
| NT5DC3 | 12q23.3 | -0.357973511 | 2.71E-06 |
| HHEX | 10q23.33 | -0.357929173 | 2.72E-06 |
| PNKD | 2q35 | -0.351724559 | 4.15E-06 |
| MGST1 | 12p12.3 | -0.351410033 | 4.23E-06 |
| SMARCA2 | 9p24.3 | -0.350600856 | 4.47E-06 |
| CRIP1 | 14q32.33 | -0.35009512 | 4.62E-06 |
| MBOAT7 | 19q13.42 | -0.3436702 | 7.07E-06 |
| C12ORF76 | 12q24.11 | -0.339236589 | 9.43E-06 |
| MYADM | 19q13.42 | -0.338636399 | 9.80E-06 |
| CHRFAM7A | 15q13.2 | -0.33751732 | 1.05E-05 |
| EVA1B | 1p34.3 | -0.337180157 | 1.08E-05 |
| SH3D21 | 1p34.3 | -0.335021429 | 1.23E-05 |
| TNFRSF1A | 12p13.31 | -0.334573887 | 1.27E-05 |
| TBC1D29P | 17q11.2 | -0.333859861 | 1.33E-05 |
| IL1RAP | 3q28 | -0.332732455 | 1.43E-05 |
| NUDT3 | 6p21.31 | -0.331154283 | 1.58E-05 |
| WT1-AS | 11p13 | -0.328930066 | 1.81E-05 |
| ATXN7L1 | 7q22.3 | -0.328895793 | 1.81E-05 |
| TAGLN2 | 1q23.2 | -0.328801573 | 1.82E-05 |
| ZNF688 | 16p11.2 | -0.327585037 | 1.97E-05 |
| ADAM17 | 2p25.1 | -0.327152737 | 2.02E-05 |
| TMEM216 | 11q13.1 | -0.327131953 | 2.02E-05 |
| SLC5A10 | 17p11.2 | -0.327115553 | 2.03E-05 |
| G6PC3 | 17q21.31 | -0.326060902 | 2.16E-05 |
| RFX2 | 19p13.3 | -0.32436357 | 2.40E-05 |
| RNF41 | 12q13.3 | -0.323927338 | 2.46E-05 |
| ZNF629 | 16p11.2 | -0.32370265 | 2.50E-05 |
| C16ORF54 | 16p11.2 | -0.323674939 | 2.50E-05 |
| CYSLTR2 | 13q14.2 | -0.322479186 | 2.69E-05 |
| ITPA | 20p13 | -0.322125864 | 2.75E-05 |
| APBB1IP | 10p12.1 | -0.321951281 | 2.78E-05 |
| OAZ2 | 15q22.31 | -0.321787783 | 2.81E-05 |
| S100Z | 5q13.3 | -0.321009089 | 2.94E-05 |
| NIT2 | 3q12.2 | -0.320496425 | 3.03E-05 |
| YWHAE | 17p13.3 | -0.319708032 | 3.18E-05 |
| TIE1 | 1p34.2 | -0.31814233 | 3.49E-05 |
| WNT7B | 22q13.31 | -0.317924644 | 3.54E-05 |
| ITGAE | 17p13.2 | -0.316932721 | 3.76E-05 |
| TMEM102 | 17p13.1 | -0.315822874 | 4.01E-05 |
| ZNF609 | 15q22.1 | -0.315479251 | 4.10E-05 |
| RASGRP3 | 2p22.3 | -0.31415741 | 4.43E-05 |
| IGF2BP2-AS1 | 3q27.2 | -0.313658603 | 4.56E-05 |
| FAM166B | 9p13.3 | -0.311881123 | 5.06E-05 |
| LINC01134 | 1p36.32 | -0.311785519 | 5.09E-05 |
| F11R | 1q23.3 | -0.311502645 | 5.18E-05 |
| RRNAD1 | 1q23.1 | -0.311392014 | 5.21E-05 |
| RPL26 | 17p13.1 | -0.311174263 | 5.28E-05 |
| DEPDC7 | 11p13 | -0.310257011 | 5.57E-05 |
| STING1 | 5q31.2 | -0.309403496 | 5.85E-05 |
| PROK2 | 3p13 | -0.309033547 | 5.97E-05 |
| TMED6 | 16q22.1 | -0.308073342 | 6.32E-05 |
| ANXA1 | 9q21.13 | -0.307440133 | 6.55E-05 |
| AMN | 14q32.32 | -0.306883131 | 6.76E-05 |
| ADGRE5 | 19p13.12 | -0.305548821 | 7.30E-05 |
| TPPP3 | 16q22.1 | -0.305027844 | 7.52E-05 |
| STOML3 | 13q13.2 | -0.304965494 | 7.55E-05 |
| WT1 | 11p13 | -0.304817962 | 7.61E-05 |
| RTN4 | 2p16.1 | -0.304806151 | 7.62E-05 |
| PGPEP1 | 19p13.11 | -0.30462187 | 7.70E-05 |
| CCDC189 | 16p11.2 | -0.304584459 | 7.71E-05 |
| NCSTN | 1q23.2 | -0.304161858 | 7.90E-05 |
| SCARNA9 | 11q21 | -0.303420574 | 8.24E-05 |
| RCC1 | 1p35.3 | -0.303186412 | 8.35E-05 |
| ANXA9 | 1q21.3 | -0.301559745 | 9.16E-05 |
| VAMP8 | 2p11.2 | -0.301411488 | 9.23E-05 |
| SNHG29 | 17p11.2 | -0.300979188 | 9.46E-05 |
| IQCK | 16p12.3 | -0.300682674 | 9.62E-05 |
| ORAI2 | 7q22.1 | -0.300176939 | 9.90E-05 |
| DUSP18 | 22q12.2 | -0.30014507 | 9.92E-05 |
| PRSS57 | 19p13.3 | -0.300053622 | 9.97E-05 |
| OSBPL5 | 11p15.4 | -0.299783435 | 0.000101189 |
| PYM1 | 12q13.2 | -0.299655962 | 0.000101913 |
| VIM | 10p13 | -0.299604695 | 0.000102206 |
| NFU1 | 2p13.3 | -0.29942457 | 0.000103242 |
| CPXM1 | 20p13 | -0.299118358 | 0.000105024 |
| ITGA5 | 12q13.13 | -0.298900822 | 0.000106308 |
| SKIDA1 | 10p12.31 | -0.298895487 | 0.00010634 |
| CCDC115 | 2q21.1 | -0.298790183 | 0.000106967 |
| SNORD104 | 17q23.3 | -0.298555814 | 0.000108374 |
| AGXT | 2q37.3 | -0.298450445 | 0.000109013 |
| CLNS1A | 11q14.1 | -0.29830641 | 0.000109891 |
| TMEM106A | 17q21.31 | -0.298232974 | 0.000110342 |
| GAPT | 5q11.2 | -0.298140141 | 0.000110914 |
| SWSAP1 | 19p13.2 | -0.297443401 | 0.000115295 |
| PLPPR3 | 19p13.3 | -0.297289396 | 0.000116285 |
| VPS35L | 16p12.3 | -0.297217346 | 0.000116751 |
| HOMEZ | 14q11.2 | -0.297142525 | 0.000117237 |
| KCNE3 | 11q13.4 | -0.296079788 | 0.000124342 |
| CCDC24 | 1p34.1 | -0.294766261 | 0.000133679 |
| CA5B | Xp22.2 | -0.294002808 | 0.000139403 |
| DBI | 2q14.2 | -0.293904432 | 0.000140157 |
| SEZ6 | 17q11.2 | -0.29338484 | 0.000144203 |
| CFAP45 | 1q23.2 | -0.293328032 | 0.000144651 |
| MAVS | 20p13 | -0.293239355 | 0.000145355 |
| ZNF469 | 16q24.2 | -0.293237969 | 0.000145366 |
| CASP9 | 1p36.21 | -0.293165919 | 0.00014594 |
| TRIQK | 8q22.1 | -0.292857341 | 0.000148421 |
| B3GNT8 | 19q13.2 | -0.292676811 | 0.000149891 |
| HACD4 | 9p21.3 | -0.292471745 | 0.000151577 |
| NEK11 | 3q22.1 | -0.291927213 | 0.000156141 |
| SULT1C4 | 2q12.3 | -0.291819138 | 0.000157062 |
| RNF220 | 1p34.1 | -0.291748474 | 0.000157667 |
| AADACL2 | 3q25.1 | -0.291718527 | 0.000157924 |
| IMPA2 | 18p11.21 | -0.29158359 | 0.000159087 |
| MLLT1 | 19p13.3 | -0.290797968 | 0.000166017 |
| INE2 | Xp22.2 | -0.290410007 | 0.000169542 |
| RSPH3 | 6q25.3 | -0.288574117 | 0.000187189 |
| GPR27 | 3p13 | -0.288196607 | 0.000191024 |
| TMEM52B | 12p13.2 | -0.288042255 | 0.000192613 |
| DPEP2 | 16q22.1 | -0.287814821 | 0.000194976 |
| AFMID | 17q25.3 | -0.287347881 | 0.000199914 |
| MINDY1 | 1q21.3 | -0.28720101 | 0.00020149 |
| MAP2K5 | 15q23 | -0.286950221 | 0.00020421 |
| RPL12 | 9q33.3 | -0.286346109 | 0.000210901 |
| NKX2-3 | 10q24.2 | -0.286019208 | 0.000214607 |
| C11ORF49 | 11p11.2 | -0.285304155 | 0.000222924 |
| CHST14 | 15q15.1 | -0.285162827 | 0.000224603 |
| MMP19 | 12q13.2 | -0.284472809 | 0.00023297 |
| LAMP2 | Xq24 | -0.283572184 | 0.000244327 |
| MDFI | 6p21.1 | -0.281924483 | 0.000266448 |
| RABL2B | 22q13.33 | -0.281798646 | 0.000268212 |
| NR1I2 | 3q13.33 | -0.281658702 | 0.000270186 |
| SUMF1 | 3p26.1 | -0.281054591 | 0.000278863 |
| POLR1D | 13q12.2 | -0.280482542 | 0.000287318 |
| CAMKV | 3p21.31 | -0.279668566 | 0.000299759 |
| TIMP2 | 17q25.3 | -0.279172977 | 0.000307577 |
| TSPAN31 | 12q14.1 | -0.278956827 | 0.000311045 |
| STAT6 | 12q13.3 | -0.278956827 | 0.000311045 |
| ATP2A3 | 17p13.2 | -0.278930501 | 0.00031147 |
| BIK | 22q13.2 | -0.278444164 | 0.000319417 |
| GMDS | 6p25.3 | -0.278413681 | 0.000319922 |
| TCAIM | 3p21.31 | -0.278279473 | 0.000322151 |
| SSC4D | 7q11.23 | -0.277830353 | 0.000329716 |
| EIF2S3 | Xp22.11 | -0.277522755 | 0.000334992 |
| PRAM1 | 19p13.2 | -0.277241483 | 0.000339885 |
| PHC1 | 12p13.31 | -0.276437848 | 0.000354231 |
| RPL9 | 4p14 | -0.276307604 | 0.000356609 |
| C22ORF39 | 22q11.21 | -0.27609284 | 0.000360561 |
| C20ORF197 | 20q13.33 | -0.275501198 | 0.00037166 |
| SNORD49B | 17p11.2 | -0.275319688 | 0.000375128 |
| STAC3 | 12q13.3 | -0.275236553 | 0.000376726 |
| HINT1 | 5q23.3 | -0.275229625 | 0.00037686 |
| HOXB3 | 17q21.32 | -0.274887388 | 0.000383509 |
| PIK3R6 | 17p13.1 | -0.274873532 | 0.00038378 |
| FBXL12 | 19p13.2 | -0.274470329 | 0.000391758 |
| SSH3 | 11q13.2 | -0.273372952 | 0.000414254 |
| LRMDA | 10q22.2-q22.3 | -0.27309168 | 0.000420209 |
| LINC00271 | 6q23.3 | -0.272516342 | 0.000432639 |
| ZSWIM1 | 20q13.12 | -0.271877915 | 0.000446829 |
| RHEX | 1q32.1 | -0.271855745 | 0.000447329 |
| ZCCHC3 | 20p13 | -0.271839307 | 0.0004477 |
| KMT2E-AS1 | 7q22.3 | -0.271728272 | 0.000450216 |
| RNASE12 | 14q11.2 | -0.271709866 | 0.000450635 |
| SMIM4 | 3p21.1 | -0.271314173 | 0.000459715 |
| SPPL3 | 12q24.31 | -0.27067939 | 0.000474636 |
| TWF2 | 3p21.2 | -0.269910395 | 0.00049331 |
| HOXB4 | 17q21.32 | -0.269668293 | 0.000499329 |
| PRR13 | 12q13.13 | -0.26934508 | 0.000507469 |
| SMIM3 | 5q33.1 | -0.268440298 | 0.000530913 |
| PEDS1 | 20q13.13 | -0.268238004 | 0.00053629 |
| THBS3 | 1q22 | -0.268071735 | 0.000540746 |
| NEK8 | 17q11.2 | -0.267887453 | 0.000545726 |
| ZNF581 | 19q13.42 | -0.267718412 | 0.00055033 |
| RTN3 | 11q13 | -0.267524432 | 0.000555659 |
| NFIC | 19p13.3 | -0.267366476 | 0.000560033 |
| PDE6B | 4p16.3 | -0.267341535 | 0.000560726 |
| NCKAP5L | 12q13.12 | -0.267281956 | 0.000562386 |
| LINC00294 | 11p13 | -0.266206748 | 0.000593132 |
| IGLL1 | 22q11.23 | -0.266005839 | 0.000599046 |
| NUDT18 | 8p21.3 | -0.265638661 | 0.000609996 |
| DNAAF4 | 15q21.3 | -0.265491974 | 0.000614421 |
| MAB21L4 | 2q37.3 | -0.265486687 | 0.000614581 |
| RPL37 | 5p13.1 | -0.265392029 | 0.000617454 |
| SULT1A1 | 16p11.2 | -0.265346305 | 0.000618846 |
| ZMYND12 | 1p34.2 | -0.265202205 | 0.000623251 |
| FNBP1 | 9q34.11 | -0.265084431 | 0.000626873 |
| ZG16B | 16p13.3 | -0.264961564 | 0.000630672 |
| WASHC3 | 12q23.2 | -0.264916776 | 0.000632062 |
| PAQR7 | 1p36.11 | -0.264607792 | 0.00064173 |
| MIR1915HG | 10p12.31 | -0.264541041 | 0.000643837 |
| FUT4 | 11q21 | -0.26431405 | 0.000651047 |
| IKBKE | 1q32.1 | -0.264024464 | 0.000660355 |
| ARL11 | 13q14.2 | -0.263776446 | 0.000668423 |
| NQO1 | 16q22.1 | -0.263769701 | 0.000668644 |
| DDX19B | 16q22.1 | -0.263757231 | 0.000669052 |
| UBE2Z | 17q21.32 | -0.263752891 | 0.000669194 |
| QPRT | 16p11.2 | -0.263601863 | 0.000674157 |
| LINC00899 | 22q13.31 | -0.263599092 | 0.000674248 |
| HOXB2 | 17q21.32 | -0.262383612 | 0.000715446 |
| COMMD6 | 13q22.2 | -0.262043089 | 0.000727397 |
| C5ORF15 | 5q31.1 | -0.262022305 | 0.000728132 |
| TCEAL1 | Xq22.2 | -0.260984508 | 0.00076573 |
| SIGLEC15 | 18q21.1 | -0.260470459 | 0.000785007 |
| PLEKHA8P1 | 12q12 | -0.260419193 | 0.000786954 |
| LBHD1 | 11q12.3 | -0.260342986 | 0.000789856 |
| RNF135 | 17q11.2 | -0.259916228 | 0.00080629 |
| TRIM65 | 17q25.1 | -0.259889903 | 0.000807314 |
| ANTXR2 | 4q21.21 | -0.259880203 | 0.000807692 |
| AIFM3 | 22q11.21 | -0.259817853 | 0.000810123 |
| SUMF2 | 7p11.2 | -0.259460374 | 0.000824191 |
| LRRC23 | 12p13.31 | -0.259120907 | 0.000837759 |
| C8ORF44 | 8q13.1 | -0.259095967 | 0.000838764 |
| CEP89 | 19q13.11 | -0.258687222 | 0.00085539 |
| EPS15L1 | 19p13.11 | -0.258469686 | 0.000864362 |
| LRSAM1 | 9q33.3-q34.11 | -0.258026301 | 0.000882917 |
| MRPL57 | 13q12.11 | -0.257890515 | 0.000888672 |
| CREG1 | 1q24.2 | -0.257750572 | 0.000894639 |
| UFC1 | 1q23.3 | -0.257736716 | 0.000895232 |
| HOXB8 | 17q21.32 | -0.25771186 | 0.000896296 |
| FAM71E1 | 19q13.33 | -0.256942958 | 0.000929801 |
| COMT | 22q11.21 | -0.256721088 | 0.000939681 |
| MFSD1 | 3q25.32 | -0.256225051 | 0.000962118 |
| TMEM218 | 11q24.2 | -0.25604077 | 0.000970578 |
| SLCO3A1 | 15q26.1 | -0.25592161 | 0.000976084 |
| TTC9C | 11q12.3 | -0.255191411 | 0.001010459 |
| SLC16A5 | 17q25.1 | -0.255172013 | 0.001011388 |
| HOXB6 | 17q21.32 | -0.255051786 | 0.001017157 |
| C4ORF36 | 4q21.3 | -0.254626965 | 0.001037788 |
| NHSL1 | 6q24.1 | -0.254563745 | 0.001040891 |
| UBE2R2 | 9p13.3 | -0.25440856 | 0.001048543 |
| NBR2 | 17q21.31 | -0.254173012 | 0.001060257 |
| CES2 | 16q22.1 | -0.254134216 | 0.001062198 |
| SNHG3 | 1p35.3 | -0.254124517 | 0.001062684 |
| TCTN1 | 12q24.11 | -0.254099576 | 0.001063933 |
| FANK1 | 10q26.2 | -0.253430869 | 0.001097952 |
| ZFAS1 | 20q13.13 | -0.253200337 | 0.001109909 |
| PACSIN2 | 22q13.2 | -0.253160155 | 0.001112005 |
| SCARNA2 | 1q13.1 | -0.252862256 | 0.00112766 |
| CMTM3 | 16q22.1 | -0.252827617 | 0.001129493 |
| SDCCAG8 | 1q43-q44 | -0.252754181 | 0.001133389 |
| GRHPR | 9p13.2 | -0.252330195 | 0.001156122 |
| LRRC34 | 3q26.2 | -0.252217963 | 0.00116221 |
| SNORD52 | 6p21.33 | -0.251785663 | 0.001185932 |
| DCTPP1 | 16p11.2 | -0.251644334 | 0.001193783 |
| METTL21A | 2q33.3 | -0.251623206 | 0.001194961 |
| ARF3 | 12q13.12 | -0.251501619 | 0.001201759 |
| TMEM53 | 1p34.1 | -0.251102573 | 0.001224321 |
| RPL10A | 6p21.31 | -0.250752022 | 0.00124446 |
| CFAP52 | 17p13.1 | -0.250509739 | 0.001258556 |
| SMIM12 | 1p34.3 | -0.250210262 | 0.001276181 |
| SNORD4B | 17q11 | -0.25018255 | 0.001277823 |
| MGST2 | 4q31.1 | -0.249888808 | 0.00129535 |
| ADO | 10q21.3 | -0.249830614 | 0.001298848 |
| RNF170 | 8p11.21 | -0.249701755 | 0.001306625 |
| ARMC10 | 7q22.1 | -0.249603552 | 0.001312581 |
| AMACR | 5p13.2 | -0.249291797 | 0.001331651 |
| DENND6B | 22q13.33 | -0.249211261 | 0.001336619 |
| RPA4 | Xq21.33 | -0.248953543 | 0.001352629 |
| TMEM60 | 7q11.23 | -0.248773418 | 0.001363923 |
| ZSWIM7 | 17p12 | -0.248711067 | 0.001367853 |
| KDM6B | 17p13.1 | -0.248557268 | 0.00137759 |
| GLUD1 | 10q23.2 | -0.248515701 | 0.001380232 |
| C16ORF74 | 16q24.1 | -0.248413168 | 0.00138677 |
| RNFT1 | 17q23.1 | -0.247828455 | 0.001424597 |
| CD33 | 19q13.41 | -0.247771646 | 0.001428322 |
| TREML2 | 6p21.1 | -0.247669114 | 0.001435068 |
| ATP8B4 | 15q21.2 | -0.247389227 | 0.00145363 |
| DIAPH2 | Xq21.33 | -0.247331033 | 0.001457516 |
| N4BP2L1 | 13q13.1 | -0.247192646 | 0.001466798 |
| MPZL1 | 1q24.2 | -0.247141209 | 0.001470261 |
| ROPN1L | 5p15.2 | -0.246923844 | 0.001484979 |
| GATAD1 | 7q21.2 | -0.246591135 | 0.001507769 |
| ARRB1 | 11q13.4 | -0.246489988 | 0.00151476 |
| ADRB2 | 5q32 | -0.24624474 | 0.001531834 |
| SUCNR1 | 3q25.1 | -0.246185161 | 0.001536009 |
| NMNAT1 | 1p36.22 | -0.246161606 | 0.001537662 |
| ELP5 | 17p13.1 | -0.245689124 | 0.001571168 |
| POTEA | 8p11.1 | -0.245570574 | 0.001579679 |
| SPAG7 | 17p13.2 | -0.245492372 | 0.001585316 |
| ALKBH4 | 7q22.1 | -0.245409408 | 0.001591317 |
| ORAI1 | 12q24.31 | -0.24540231 | 0.001591831 |
| KCNQ5 | 6q13 | -0.245387068 | 0.001592936 |
| DHRS1 | 14q12 | -0.245212486 | 0.001605643 |
| ARTN | 1p34.1 | -0.245097652 | 0.001614051 |
| CLVS1 | 8q12.2-q12.3 | -0.245039458 | 0.001618327 |
| ACYP2 | 2p16.2 | -0.24497001 | 0.001623444 |
| PPCS | 1p34.2 | -0.244789885 | 0.001636784 |
| RPL10 | Xq28 | -0.244389453 | 0.001666799 |
| IL5RA | 3p26.2 | -0.244199967 | 0.001681176 |
| PLD1 | 3q26.31 | -0.244163604 | 0.001683948 |
| ZDHHC16 | 10q24.1 | -0.243984864 | 0.001697634 |
| WDR25 | 14q32.2 | -0.243861717 | 0.001707122 |
| PHYKPL | 5q35.3 | -0.243505455 | 0.001734844 |
| STYXL1 | 7q11.23 | -0.243437561 | 0.001740173 |
| RAB32 | 6q24.3 | -0.243217255 | 0.001757569 |
| TALDO1 | 11p15.5 | -0.243160446 | 0.00176208 |
| COL9A2 | 1p34.2 | -0.243026045 | 0.001772795 |
| ACAP1 | 17p13.1 | -0.242531394 | 0.001812744 |
| RUSC1 | 1q22 | -0.242243194 | 0.001836396 |
| SERTM1 | 13q13.3 | -0.242101638 | 0.001848115 |
| CASP2 | 7q34 | -0.24210048 | 0.001848212 |
| EIF4EBP3 | 5q31.3 | -0.242076925 | 0.001850169 |
| TPPP | 5p15.33 | -0.242061684 | 0.001851436 |
| PHF20 | 20q11.22-q11.23 | -0.241921908 | 0.001863094 |
| CERS5 | 12q13.12 | -0.241770712 | 0.001875779 |
| MTCP1 | Xq28 | -0.241722217 | 0.001879865 |
| TM9SF4 | 20q11.21 | -0.241688963 | 0.001882671 |
| ING4 | 12p13.31 | -0.241651553 | 0.001885833 |
| PIGS | 17q11.2 | -0.2416086 | 0.001889468 |
| ZNF18 | 17p12 | -0.241575346 | 0.001892288 |
| KDSR | 18q21.33 | -0.241370281 | 0.001909757 |
| TAOK3 | 12q24.23 | -0.24123588 | 0.001921287 |
| RBKS | 2p23.2 | -0.241163997 | 0.001927479 |
| PAK2 | 3q29 | -0.240597129 | 0.00197695 |
| TFAP4 | 16p13.3 | -0.240458738 | 0.001989202 |
| KLF17 | 1p34.1 | -0.240194788 | 0.002012761 |
| RGS3 | 9q32 | -0.240017958 | 0.002028686 |
| PAQR8 | 6p12.2 | -0.239815663 | 0.002047044 |
| PHF21A | 11p11.2 | -0.239345953 | 0.002090254 |
| CFAP36 | 2p16.1 | -0.239163057 | 0.002107302 |
| COQ4 | 9q34.11 | -0.238959377 | 0.002126436 |
| ASB14 | 3p14.3 | -0.238890098 | 0.00213298 |
| MLLT10 | 10p12.31 | -0.238876242 | 0.002134291 |
| TRPC2 | 11p15.4 | -0.238485509 | 0.002171564 |
| DCAF7 | 17q23.3 | -0.238455027 | 0.002174496 |
| PABPN1 | 14q11.2 | -0.238169598 | 0.00220213 |
| CCL1 | 17q12 | -0.238151841 | 0.00220386 |
| YWHAG | 7q11.23 | -0.238032426 | 0.002215524 |
| CLEC11A | 19q13.33 | -0.237957605 | 0.002222861 |
| VPS4B | 18q21.33 | -0.237913266 | 0.002227219 |
| CERS2 | 1q21.3 | -0.237837059 | 0.002234727 |
| PTPN6 | 12p13.31 | -0.237791335 | 0.002239244 |
| CHTF8 | 16q22.1 | -0.237504521 | 0.002267762 |
| HOXB5 | 17q21.32 | -0.237424034 | 0.002275824 |
| EXOSC6 | 16q22.1 | -0.237306383 | 0.002287655 |
| PTGER1 | 19p13.1 | -0.23726646 | 0.002291682 |
| SLC52A3 | 20p13 | -0.237158506 | 0.002302605 |
| DNAL4 | 22q13.1 | -0.237086405 | 0.002309926 |
| ATP2B1 | 12q21.33 | -0.236993243 | 0.002319417 |
| ELF4 | Xq26.1 | -0.236835287 | 0.00233559 |
| RELL1 | 4p14 | -0.236684259 | 0.00235115 |
| DMAC2L | 14q21.3 | -0.236486286 | 0.002371688 |
| MTAP | 9p21.3 | -0.236351192 | 0.002385796 |
| ZNF579 | 19q13.42 | -0.236264429 | 0.002394897 |
| DMAC2 | 19q13.2 | -0.236256116 | 0.002395771 |
| RNF24 | 20p13 | -0.235962374 | 0.002426827 |
| A1BG | 19q13.43 | -0.235904179 | 0.002433023 |
| MYH11 | 16p13.11 | -0.235510676 | 0.002475296 |
| DAD1 | 14q11.2 | -0.235426155 | 0.002484463 |
| TMEM156 | 4p14 | -0.235391516 | 0.002488228 |
| RPL15 | 3p24.2 | -0.23451306 | 0.002585468 |
| DNAJC1 | 10p12.31 | -0.234510289 | 0.00258578 |
| TPT1 | 13q14.13 | -0.234395286 | 0.002598763 |
| ZBTB34 | 9q33.3 | -0.234255343 | 0.002614642 |
| ATP5MC2 | 12q13.13 | -0.234227631 | 0.002617797 |
| ORMDL2 | 12q13.2 | -0.234152972 | 0.002626313 |
| NOA1 | 4q12 | -0.233889551 | 0.002656562 |
| IFT140 | 16p13.3 | -0.233813344 | 0.002665371 |
| LPCAT2 | 16q12.2 | -0.23343231 | 0.002709817 |
| TLR9 | 3p21.2 | -0.233081759 | 0.002751298 |
| GPANK1 | 6p21.33 | -0.233008324 | 0.002760061 |
| SNRNP35 | 12q24.31 | -0.232980612 | 0.002763374 |
| RPS3 | 11q13.4 | -0.232944587 | 0.002767686 |
| ASB13 | 10p15.1 | -0.232934888 | 0.002768848 |
| CMTM7 | 3p22.3 | -0.23284344 | 0.002779826 |
| AKT1 | 14q32.33 | -0.232539999 | 0.002816537 |
| MFSD6L | 17p13.1 | -0.232336319 | 0.002841424 |
| CYB5B | 16q22.1 | -0.232095228 | 0.002871139 |
| C2ORF68 | 2p11.2 | -0.232088622 | 0.002871957 |
| CCDC91 | 12p11.22 | -0.232070288 | 0.002874229 |
| UGT2B28 | 4q13.2 | -0.231889245 | 0.002896749 |
| HYAL3 | 3p21.31 | -0.231800261 | 0.002907876 |
| CAT | 11p13 | -0.231424609 | 0.002955278 |
| ZNF282 | 7q36.1 | -0.231419067 | 0.002955982 |
| PROSER3 | 19q13.12 | -0.231189061 | 0.002985355 |
| ATOX1 | 5q33.1 | -0.23104219 | 0.003004249 |
| BAHCC1 | 17q25.3 | -0.230983996 | 0.003011765 |
| STARD3NL | 7p14-p13 | -0.230909174 | 0.003021454 |
| TRIO | 5p15.2 | -0.23088562 | 0.00302451 |
| KRTCAP2 | 1q22 | -0.230864836 | 0.003027209 |
| HPS6 | 10q24.32 | -0.230519987 | 0.003072306 |
| UTF1 | 10q26.3 | -0.230415674 | 0.003086066 |
| HSH2D | 19p13.11 | -0.230392354 | 0.00308915 |
| TMEM220 | 17p13.1 | -0.230339702 | 0.003096123 |
| DCLRE1C | 10p13 | -0.230303677 | 0.003100902 |
| CENPBD1 | 16q24.3 | -0.230207006 | 0.00311376 |
| METTL7A | 12q13.12 | -0.230172048 | 0.003118421 |
| POC1B | 12q21.33 | -0.230108311 | 0.003126936 |
| FAM219B | 15q24.1-q24.2 | -0.229795171 | 0.003169077 |
| DPYSL3 | 5q32 | -0.229738362 | 0.003176776 |
| BCL2L2 | 14q11.2 | -0.22961366 | 0.003193737 |
| CCDC125 | 5q13.2 | -0.229487731 | 0.003210948 |
| AIF1 | 6p21.33 | -0.229396124 | 0.003223521 |
| ADPGK | 15q24.1 | -0.229202144 | 0.00325029 |
| CFD | 19p13.3 | -0.229146721 | 0.003257975 |
| HILPDA | 7q32.1 | -0.228970752 | 0.003282485 |
| TCTN3 | 10q24.1 | -0.228645142 | 0.003328276 |
| NME2 | 17q21.33 | -0.228560621 | 0.003340256 |
| TIRAP | 11q24.2 | -0.228481644 | 0.003351485 |
| HERPUD2 | 7p14.2 | -0.228423449 | 0.003359782 |
| SCNN1A | 12p13 | -0.227920643 | 0.003432237 |
| SNX14 | 6q14.3 | -0.22781241 | 0.003448017 |
| LINC00339 | 1p36.12 | -0.22763367 | 0.003474219 |
| CPT2 | 1p32.3 | -0.227551921 | 0.003486263 |
| TCN2 | 22q12.2 | -0.227202756 | 0.003538129 |
| HOOK2 | 19p13.13 | -0.227186129 | 0.003540616 |
| CLIC1 | 6p21.33 | -0.227162574 | 0.003544142 |
| SMARCD2 | 17q23.3 | -0.227101766 | 0.00355326 |
| NAP1L1 | 12q21.1 | -0.226938111 | 0.003577903 |
| KIAA0319L | 1p34.3 | -0.226637441 | 0.003623579 |
| ATG10 | 5q14.1-q14.2 | -0.226609729 | 0.003627815 |
| OPN3 | 1q43 | -0.226516895 | 0.003642038 |
| CDC42 | 1p36.12 | -0.226497497 | 0.003645017 |
| SLC35G5 | 8p23.1 | -0.226352169 | 0.003667401 |
| RPS6KC1 | 1q32.3 | -0.226185743 | 0.003693186 |
| PCYOX1L | 5q32 | -0.226113693 | 0.0037044 |
| CALCOCO2 | 17q21.32 | -0.226102608 | 0.003706128 |
| RPL27 | 17q21.31 | -0.22597652 | 0.003725834 |
| TMEM234 | 1p35.2 | -0.225800709 | 0.003753468 |
| ZSWIM4 | 19p13.13 | -0.225603956 | 0.003784614 |
| PLB1 | 2p23.2 | -0.225160416 | 0.003855679 |
| SPATA24 | 5q31.2 | -0.225055268 | 0.003872702 |
| ADGRE1 | 19p13.3-p13.2 | -0.224877758 | 0.003901592 |
| ZNF785 | 16p11.2 | -0.224847275 | 0.003906573 |
| SNAPIN | 1q21.3 | -0.224844504 | 0.003907026 |
| GID4 | 17p11.2 | -0.224757213 | 0.003921322 |
| PLIN3 | 19p13.3 | -0.2247392 | 0.003924278 |
| UBTD2 | 5q35.1 | -0.2243069 | 0.003995821 |
| PBXIP1 | 1q21.3 | -0.224288888 | 0.003998827 |
| PHF23 | 17p13.1 | -0.224142016 | 0.004023416 |
| LAIR1 | 19q13.42 | -0.224129546 | 0.00402551 |
| ALDH3B1 | 11q13.2 | -0.224108763 | 0.004029002 |
| BCL2L13 | 22q11.21 | -0.224057496 | 0.004037627 |
| LRRC37A4P | 17q21.31 | -0.223822103 | 0.004077446 |
| PGD | 1p36.22 | -0.223758212 | 0.004088314 |
| ST20-AS1 | 15q25.1 | -0.223616883 | 0.004112448 |
| TTC30B | 2q31.2 | -0.223507422 | 0.004131228 |
| LPXN | 11q12.1 | -0.223504651 | 0.004131704 |
| HEXA | 15q23 | -0.223503266 | 0.004131942 |
| TMEM223 | 11q12.3 | -0.223432601 | 0.004144109 |
| VENTX | 10q26.3 | -0.223414751 | 0.004147187 |
| CCDC191 | 3q13.31 | -0.223374562 | 0.004154125 |
| HAVCR2 | 5q33.3 | -0.223332994 | 0.004161313 |
| SLC39A1 | 1q21.3 | -0.223302357 | 0.004166617 |
| QARS1 | 3p21.31 | -0.223246934 | 0.004176229 |
| PADI3 | 1p36.13 | -0.223096573 | 0.004202405 |
| APLF | 2p13.3 | -0.222894997 | 0.004237728 |
| SERPINB1 | 6p25.2 | -0.222831261 | 0.004248952 |
| SDSL | 12q24.13 | -0.22259017 | 0.004291651 |
| FAM234A | 16p13.3 | -0.222290886 | 0.004345193 |
| DMAC1 | 9p24.1 | -0.222199592 | 0.004361645 |
| CYB5D2 | 17p13.2 | -0.22215787 | 0.004369182 |
| SMIM26 | 20p11.23 | -0.222126002 | 0.004374946 |
| RUSC2 | 9p13.3 | -0.221533129 | 0.004483447 |
| DPRXP4 | 17q11.2 | -0.221528818 | 0.004484245 |
| ARHGAP25 | 2p13.3 | -0.221375019 | 0.004512788 |
| RPL37A | 2q35 | -0.221272487 | 0.004531907 |
| PSPH | 7p11.2 | -0.221127001 | 0.00455916 |
| JPH4 | 14q11.2 | -0.220995371 | 0.004583944 |
| NOB1 | 16q22.1 | -0.220813861 | 0.004618319 |
| FAM185A | 7q22.1 | -0.220745967 | 0.004631235 |
| MANBA | 4q24 | -0.220694701 | 0.00464101 |
| H2BC21 | 1q21.2 | -0.220594939 | 0.004660085 |
| S100G | Xp22.2 | -0.220514729 | 0.004675473 |
| UBE2I | 16p13.3 | -0.220455149 | 0.004686932 |
| CAMLG | 5q31.1 | -0.220346921 | 0.004707812 |
| C18ORF32 | 18q21.1 | -0.220334451 | 0.004710223 |
| DCDC2B | 1p35.2 | -0.220237461 | 0.004729015 |
| HMGN4 | 6p22.2 | -0.220202821 | 0.004735743 |
| RPS15A | 16p12.3 | -0.219830101 | 0.004808677 |
| ACOT9 | Xp22.11 | -0.219649976 | 0.004844283 |
| ARPC3 | 12q24.11 | -0.21961118 | 0.004851983 |
| FDX1 | 11q22.3 | -0.219608409 | 0.004852533 |
| GBE1 | 3p12.2 | -0.219537744 | 0.004866588 |
| RILPL2 | 12q24.31 | -0.219532202 | 0.004867692 |
| TBXA2R | 19p13.3 | -0.219530816 | 0.004867968 |
| PIH1D2 | 11q23.1 | -0.219475393 | 0.004879019 |
| C6ORF47 | 6p21.33 | -0.219270328 | 0.004920105 |
| ADPRH | 3q13.33 | -0.219151168 | 0.004944122 |
| RPL38 | 17q25.1 | -0.219088817 | 0.00495673 |
| AK2 | 1p35.1 | -0.219063877 | 0.004961782 |
| DNAJC14 | 12q13.2 | -0.219036165 | 0.0049674 |
| OSCP1 | 1p34.3 | -0.219027852 | 0.004969087 |
| ZNF837 | 19q13.43 | -0.218973814 | 0.004980062 |
| CNPY2 | 12q13.3 | -0.218775677 | 0.00502049 |
| GLOD4 | 17p13.3 | -0.218713326 | 0.005033273 |
| EEF1B2 | 2q33.3 | -0.218670373 | 0.005042096 |
| NCR2 | 6p21.1 | -0.218645386 | 0.005047235 |
| LGALS3BP | 17q25 | -0.218490248 | 0.005079247 |
| IMPDH2 | 3p21.31 | -0.21848332 | 0.00508068 |
| SDHAF2 | 11q12.2 | -0.218422355 | 0.005093313 |
| SGMS2 | 4q25 | -0.218361516 | 0.005105947 |
| PIWIL4 | 11q21 | -0.218319822 | 0.005114622 |
| PEX11B | 1q21.1 | -0.21817018 | 0.005145865 |
| MYLPF | 16p11.2 | -0.21802346 | 0.005176664 |
| LINC02870 | 10q26.3 | -0.217994211 | 0.005182824 |
| HK2 | 2p12 | -0.217888908 | 0.005205054 |
| DNTTIP1 | 20q13.12 | -0.217780833 | 0.005227958 |
| COX10 | 17p12 | -0.217755892 | 0.005233256 |
| NRN1L | 16q22.1 | -0.217625799 | 0.005260971 |
| PNPLA4 | Xp22.31 | -0.217582695 | 0.005270183 |
| RAB34 | 17q11.2 | -0.217531429 | 0.005281157 |
| AP1G2 | 14q11.2 | -0.217467692 | 0.00529483 |
| HSBP1 | 16q23.3 | -0.217338834 | 0.00532257 |
| MEAF6 | 1p34.3 | -0.217313893 | 0.005327954 |
| SIK3 | 11q23.3 | -0.217171179 | 0.005358857 |
| RBM15B | 3p21.2 | -0.216948101 | 0.005407482 |
| LDLRAD2 | 1p36.12 | -0.216935631 | 0.005410211 |
| CDK7 | 5q13.2 | -0.216792916 | 0.00544154 |
| ACTA2 | 10q23.31 | -0.216687612 | 0.00546476 |
| UBE2E1 | 3p24.2 | -0.216587851 | 0.00548684 |
| SIGLEC12 | 19q13.41 | -0.216532428 | 0.005499141 |
| NEU4 | 2q37.3 | -0.216107355 | 0.005594307 |
| LAMTOR1 | 11q13.4 | -0.215694154 | 0.005688224 |
| SPACA9 | 9q34.13 | -0.215568066 | 0.005717162 |
| ZNF746 | 7q36.1 | -0.215543126 | 0.005722901 |
| PBX3 | 9q33.3 | -0.215537583 | 0.005724177 |
| TP53 | 17p13.1 | -0.215501558 | 0.005732478 |
| SNORD12B | 19p13.2 | -0.21531312 | 0.005776075 |
| SMDT1 | 22q13.2 | -0.214904375 | 0.005871661 |
| RALA | 7p14.1 | -0.214764432 | 0.00590471 |
| SNHG20 | 17q25.2 | -0.214757504 | 0.00590635 |
| AQP11 | 11q14.1 | -0.214596777 | 0.005944522 |
| DGLUCY | 14q32.11 | -0.214497015 | 0.005968325 |
| ESYT1 | 12q13.2 | -0.214469304 | 0.005974952 |
| SERPINI2 | 3q26.1 | -0.214465247 | 0.005975923 |
| SLC38A10 | 17q25.3 | -0.214226828 | 0.006033221 |
| ARL6IP5 | 3p14.1 | -0.214215743 | 0.006035896 |
| SYS1 | 20q13.12 | -0.214150621 | 0.006051638 |
| RUNDC1 | 17q21.31 | -0.214103511 | 0.006063048 |
| KCNAB2 | 1p36.31 | -0.213995436 | 0.006089297 |
| TAX1BP3 | 17p13.2 | -0.213923386 | 0.006106853 |
| JRKL | 11q21 | -0.213863806 | 0.006121404 |
| LOC644936 | 5q14.1 | -0.213817766 | 0.00613267 |
| TMEM65 | 8q24.13 | -0.213806998 | 0.006135308 |
| GEMIN4 | 17p13.3 | -0.213556208 | 0.006197023 |
| ZNF689 | 16p11.2 | -0.213316504 | 0.006256528 |
| IGSF10 | 3q25.1 | -0.213111438 | 0.006307837 |
| ZNF69 | 19p13.2 | -0.212996435 | 0.006336776 |
| MSRB3 | 12q14.3 | -0.212852335 | 0.006373204 |
| GYS1 | 19q13.33 | -0.212789984 | 0.006389024 |
| INKA1 | 3p21.31 | -0.212695765 | 0.006412996 |
| PTX4 | 16p13.3 | -0.212471817 | 0.006470296 |
| PWWP2B | 10q26.3 | -0.212342443 | 0.006503606 |
| SLC25A29 | 14q32.2 | -0.212054243 | 0.006578358 |
| ZNF580 | 19q13.42 | -0.211948939 | 0.006605862 |
| CMTM6 | 3p22.3 | -0.211904601 | 0.006617473 |
| EIF4A1 | 17p13.1 | -0.211512482 | 0.006720953 |
| KIF27 | 9q21.32 | -0.211332357 | 0.006768969 |
| DOCK2 | 5q35.1 | -0.211232596 | 0.006795694 |
| SPRYD4 | 12q13.3 | -0.211150847 | 0.006817663 |
| RPS24 | 10q22.3 | -0.211123135 | 0.006825124 |
| PIGZ | 3q29 | -0.211114822 | 0.006827364 |
| MAN2B1 | 19p13.13 | -0.21055782 | 0.006978936 |
| NRG4 | 15q24.2 | -0.210525952 | 0.006987698 |
| C1RL-AS1 | 12p13.31 | -0.210420648 | 0.007016719 |
| HOXA7 | 7p15.2 | -0.210359615 | 0.007033589 |
| REXO1L1P | 8q21.2 | -0.210265336 | 0.007059719 |
| IDH1 | 2q34 | -0.210145063 | 0.007093179 |
| CHRNA7 | 15q13.3 | -0.209968146 | 0.007142653 |
| LINC01278 | Xq11.1 | -0.209960636 | 0.00714476 |
| ELF1 | 13q14.11 | -0.209851176 | 0.007175532 |
| ASCL3 | 11p15.4 | -0.209714675 | 0.007214071 |
| ETV6 | 12p13.2 | -0.209679364 | 0.00722407 |
| ALG8 | 11q14.1 | -0.209136508 | 0.007379354 |
| TMEM170A | 16q23.1 | -0.209046155 | 0.007405486 |
| PARP4 | 13q12.12 | -0.208994889 | 0.007420349 |
| TMEM192 | 4q32.3 | -0.208899284 | 0.007448139 |
| FGFBP3 | 10q23.32 | -0.208836385 | 0.007466472 |
| RAB5B | 12q13.2 | -0.208831391 | 0.007467929 |
| RPLP1 | 15q23 | -0.208762112 | 0.007488172 |
| WDR49 | 3q26.1 | -0.208599192 | 0.007535968 |
| TPCN2 | 11q13.3 | -0.208382464 | 0.007599969 |
| RNASEH2C | 11q13.1 | -0.208220351 | 0.007648157 |
| PTPMT1 | 11p11.2 | -0.207990346 | 0.007716992 |
| CT45A2 | Xq26.3 | -0.207934935 | 0.007733657 |
| GFI1 | 1p22.1 | -0.207754798 | 0.007788056 |
| ARHGAP22 | 10q11.22-q11.23 | -0.20768829 | 0.007808225 |
| USP54 | 10q22.2 | -0.207628161 | 0.0078265 |
| INPP1 | 2q32.2 | -0.207596842 | 0.007836034 |
| NMB | 15q25.2 | -0.207578829 | 0.007841522 |
| FARSA | 19p13.13 | -0.207551118 | 0.007849972 |
| IRF2BP2 | 1q42.3 | -0.207513707 | 0.007861392 |
| C20ORF96 | 20p13 | -0.207441657 | 0.007883427 |
| RACK1 | 5q35.3 | -0.207383463 | 0.007901265 |
| RBP5 | 12p13.31 | -0.207379306 | 0.00790254 |
| RABEP2 | 16p11.2 | -0.207333582 | 0.007916582 |
| SLC35B4 | 7q33 | -0.207233821 | 0.007947297 |
| MCAT | 22q13.2 | -0.207217194 | 0.007952427 |
| TMTC2 | 12q21.31 | -0.207204724 | 0.007956276 |
| CCDC73 | 11p13 | -0.207188097 | 0.00796141 |
| ZNF764 | 16p11.2 | -0.207149444 | 0.007973358 |
| LRRC61 | 7q36.1 | -0.207107733 | 0.007986269 |
| CARD6 | 5p13.1 | -0.207062009 | 0.008000443 |
| TRAPPC6A | 19q13.32 | -0.207021827 | 0.008012918 |
| SPI1 | 11p11.2 | -0.207016285 | 0.00801464 |
| PTRHD1 | 2p23.3 | -0.207014899 | 0.00801507 |
| NME1-NME2 | 17q21.33 | -0.206854173 | 0.008065153 |
| GNA15 | 19p13.3 | -0.206840317 | 0.008069484 |
| TMEM71 | 8q24.22 | -0.206829375 | 0.008072905 |
| FUCA2 | 6q24.2 | -0.206565973 | 0.008155653 |
| FANCF | 11p14.3 | -0.206320725 | 0.008233373 |
| PITPNA | 17p13.3 | -0.206196023 | 0.008273142 |
| NIPSNAP3A | 9q31.1 | -0.206182168 | 0.008277572 |
| VMAC | 19p13.3 | -0.206169698 | 0.00828156 |
| HAAO | 2p21 | -0.206121202 | 0.008297086 |
| SNORD61 | Xq26.3 | -0.206101804 | 0.008303303 |
| MYCNOS | 2p24.3 | -0.206098224 | 0.008304451 |
| RNF125 | 18q12.1 | -0.206065779 | 0.008314861 |
| REN | 1q32.1 | -0.205989753 | 0.008339299 |
| GIT2 | 12q24.11 | -0.205932764 | 0.00835766 |
| MTHFSD | 16q24.1 | -0.205774808 | 0.008408737 |
| PCBP2 | 12q13.13 | -0.20576788 | 0.008410984 |
| SYTL1 | 1p36.11 | -0.205722156 | 0.008425824 |
| TRAPPC2 | Xp22.2 | -0.205672275 | 0.00844204 |
| HOXA9 | 7p15.2 | -0.205663627 | 0.008444855 |
| MRPS36 | 5q13.2 | -0.20563625 | 0.008453769 |
| CDIP1 | 16p13.3 | -0.205573899 | 0.008474103 |
| RPS20 | 8q12.1 | -0.205544802 | 0.008483607 |
| FUT11 | 10q22.2 | -0.205518476 | 0.008492214 |
| BABAM2 | 2p23.2 | -0.205474138 | 0.008506728 |
| C1ORF210 | 1p34.2 | -0.205415098 | 0.008526088 |
| RASGRP4 | 19q13.2 | -0.205389618 | 0.008534455 |
| GALK1 | 17q25.1 | -0.205165154 | 0.00860848 |
| GLA | Xq22.1 | -0.205126358 | 0.008621332 |
| LGALS9 | 17q11.2 | -0.204983644 | 0.008668756 |
| DHRS7B | 17p11.2 | -0.204971315 | 0.008672863 |
| H2AC15 | 6p22.1 | -0.204856312 | 0.008711262 |
| FAM216A | 12q24.11 | -0.204730083 | 0.008753582 |
| RPS8 | 1p34.1 | -0.204725926 | 0.008754979 |
| TMEM150A | 2p11.2 | -0.204396159 | 0.008866415 |
| PIGX | 3q29 | -0.204253445 | 0.008915029 |
| CYSLTR1 | Xq21.1 | -0.20417031 | 0.008943456 |
| TM7SF3 | 12p11.23 | -0.204116272 | 0.008961977 |
| ABHD14A | 3p21.2 | -0.204048379 | 0.008985295 |
| TNRC18 | 7p22.1 | -0.204044222 | 0.008986725 |
| GCC1 | 7q32.1 | -0.203926448 | 0.009027307 |
| HOXA3 | 7p15.2 | -0.20389602 | 0.009037819 |
| ADRB1 | 10q25.3 | -0.203795275 | 0.009072697 |
| PTTG3P | 8q13.1 | -0.20371307 | 0.009101246 |
| SNORA31 | 13q14.13 | -0.203677045 | 0.009113782 |
| ADGRE2 | 19p13.12 | -0.203577283 | 0.009148577 |
| CARD9 | 9q34.3 | -0.203433183 | 0.009199043 |
| RPPH1 | 14q11.2 | -0.20327107 | 0.009256111 |
| CUX1 | 7q22.1 | -0.20322119 | 0.009273734 |
| MAML3 | 4q31.1 | -0.203192093 | 0.009284027 |
| RCC2 | 1p36.13 | -0.202892808 | 0.00939049 |
| NFIX | 19p13.13 | -0.202824915 | 0.009414791 |
| ABRACL | 6q24.1 | -0.202793046 | 0.009426216 |
| EMC10 | 19q13.33 | -0.202758407 | 0.009438649 |
| SHLD1 | 20p12.3 | -0.202665573 | 0.009472042 |
| TMEM42 | 3p21.31 | -0.202662802 | 0.00947304 |
| FAM161B | 14q24.3 | -0.202539486 | 0.009517563 |
| C14ORF119 | 14q11.2 | -0.20250069 | 0.009531608 |
| ATXN2 | 12q24.12 | -0.202450809 | 0.009549693 |
| SCAMP2 | 15q24.1 | -0.202403699 | 0.009566801 |
| SCAMP1 | 5q14.1 | -0.202339963 | 0.00958999 |
| A1BG-AS1 | 19q13.43 | -0.20227221 | 0.009614696 |
| TBC1D9B | 5q35.3 | -0.20204622 | 0.009697506 |
| C1QBP | 17p13.2 | -0.201979713 | 0.009721997 |
| PFKP | 10p15.2 | -0.201963086 | 0.009728128 |
| TMEM251 | 14q32.12 | -0.201846837 | 0.00977109 |
| RASA4 | 7q22.1 | -0.201835339 | 0.009775348 |
| SETDB1 | 1q21.3 | -0.201759406 | 0.009803512 |
| HYAL1 | 3p21.31 | -0.201704123 | 0.009824062 |
| KIAA1958 | 9q32 | -0.201688742 | 0.009829786 |
| KIAA0753 | 17p13.1 | -0.201591751 | 0.009865949 |
| TGIF2 | 20q11.23 | -0.201577895 | 0.009871125 |
| BTF3 | 5q13.2 | -0.201551569 | 0.009880965 |
| HEATR5B | 2p22.2 | -0.201458736 | 0.009915735 |
| RABL2A | 2q14.1 | -0.201336805 | 0.009961568 |
| LMO3 | 12p12.3 | -0.201312962 | 0.009970552 |
| CCDC153 | 11q23.3 | -0.201305076 | 0.009973525 |
| APPL1 | 3p14.3 | -0.201295238 | 0.009977235 |
| HNF1A | 12q24.31 | -0.201230813 | 0.010001561 |
| P2RX4 | 12q24.31 | -0.201199633 | 0.010013352 |
| MPLKIP | 7p14.1 | -0.200941916 | 0.010111287 |
| GTF2H2 | 5q13.2 | -0.200770243 | 0.010176992 |
| TMEM44 | 3q29 | -0.200735604 | 0.010190296 |
| SINHCAF | 12p11.21 | -0.200706367 | 0.010201536 |
| ST20 | 15q25.1 | -0.200691126 | 0.0102074 |
| NT5C2 | 10q24.32-q24.33 | -0.200504073 | 0.010279609 |
| ZXDC | 3q21.3 | -0.20042371 | 0.010310771 |
| MGAT4B | 5q35.3 | -0.200163221 | 0.01041235 |
| UBQLN2 | Xp11.21 | -0.200091171 | 0.010440602 |
| BCKDK | 16p11.2 | -0.200055146 | 0.010454753 |
| AMDHD1 | 12q23.1 | -0.200053899 | 0.010455243 |
| MYCN | 2p24.3 | -0.200025218 | 0.010466522 |
