# Supplementary material for: Expression And Clinical Significance of Transcription Factor GRHL1 In Acute Myeloid Leukemia
Source: Research Square preprint supplement (doi:10.21203/rs.3.rs-1242340/v1), 2022-01-24
Supplement: Supplementary file 3 [file 6c334c372e3457c5475ba4a3.docx]

**Table S1.** Clinical pathological characteristics of the patients with AML in multiple clinical cohorts.

|  | TCGA-LAML | GSE30029 | GSE12417-GPL97 |
| --- | --- | --- | --- |
| No. of patients | 150 | 46 | 163 |
| Age, No. (%) |  |  |  |
| <60 | 83 (55.3) | NA | 75 (46.0) |
| ≥60 | 67 (44.7) | NA | 88 (54.0) |
| Gender, No. (%) |  |  |  |
| Male | 82 (54.7) | NA | NA |
| Female | 68 (45.3) | NA | NA |
| FAB classification, No. (%) |  |  |  |
| M0 Undifferentiated | 15 (10.0) | NA | 5 (3.1) |
| M1 | 35 (23.3) | NA | 45 (27.6) |
| M2 | 38 (25.3) | NA | 45 (27.6) |
| M3 | 15 (10.0) | NA | 0 (0) |
| M4 | 28 (18.7) | NA | 42 (25.8) |
| M5 | 15 (10.0) | NA | 19 (11.7) |
| M6 | 2 (1.3) | NA | 6 (3.7) |
| M7 | 1 (0.7) | NA | 0 (0) |
| Cytogenetic risk group No. (%) |  |  |  |
| Favorable | 31 (20.7) | NA | NA |
| Intermediate | 81 (54.0) | NA | NA |
| Poor | 36 (24.0) | NA | NA |
| Survival status, No. (%) |  |  |  |
| Alive | 54 (36.0) | NA | 60 (36.8) |
| Dead | 96 (64.0) | NA | 103 (63.2) |
| Platelet count, No. (%) |  |  |  |
| <10x109/L | 123 (82.0) | NA | NA |
| ≥ 10x109/L | 27 (18.0) | NA | NA |
| Leukocyte count, No. (%) |  |  |  |
| <10x109/L | 43 (28.7) | NA | NA |
| ≥ 10x109/L | 107 (71.3) | NA | NA |
